# Supplementary material for: Interleukin-4 Receptor Targeting Peptide Decorated Extracellular Vesicles as a Platform for In Vivo Drug Delivery to Thyroid Cancer
Source: MDPI journal article supplement (doi:10.3390/biomedicines10081978), 2022-08-15
Supplement: s1 [file s1]

---

**Supplementary Information**

Article

# **Interleukin-4 Receptor Targeting Peptide Decorated Extracellular Vesicles as A Platform For In Vivo Drug Delivery to Thyroid Cancer**

**Prakash Gangadaran<sup>1,2</sup>, Gowri Rangaswamy Gunassekaran<sup>3</sup>, Ramya Lakshmi Rajendran<sup>2</sup>, Ji Min Oh<sup>2</sup>, Sri Murugan Poongkavithai Vadevoo<sup>3</sup>, Ho Won Lee<sup>2</sup>, Chae Moon Hong<sup>2,4</sup>, Byungheon Lee<sup>1,3</sup>, Jaetae Lee<sup>2,4</sup> and Byeong-Cheol Ahn<sup>1,2,4,\*</sup>**

<sup>1</sup> BK21 FOUR KNU Convergence Educational Program of Biomedical Sciences for Creative Future Talents, Department of Biomedical Sciences, School of Medicine, Kyungpook National University, Daegu, Republic of Korea.

<sup>2</sup> Department of Nuclear Medicine, School of Medicine, Kyungpook National University, Daegu, Republic of Korea.

<sup>3</sup> Department of Biochemistry and Cell Biology, Kyungpook National University, Daegu, Republic of Korea.

<sup>4</sup> Department of Nuclear Medicine, Kyungpook National University Hospital, Daegu, Republic of Korea.

\* Correspondence: Byeong-Cheol Ahn (abc2000@knu.ac.kr); Tel: 82-53-420-5583.

**Table-S1.** List of antibodies.

| <b>S. no</b> | <b>Antibody</b>                       | <b>Company</b> | <b>WB</b> | <b>IF</b> |
|--------------|---------------------------------------|----------------|-----------|-----------|
| 1            | CD63                                  | Abcam          | 1:4000    | -         |
| 2            | ALIX                                  | Abcam          | 1:4000    | -         |
| 3            | GM130                                 | Abcam          | 1:4000    | -         |
| 4            | Cytochrome-C                          | Abcam          | 1:4000    | -         |
| 6            | IL4R                                  | Santacruz      | 1:3000    | 1:200     |
| 7            | Anti-rabbit secondary                 | Cell Signaling | 1:10000   | -         |
| 8            | Anti-mouse secondary                  | Cell Signaling | 1:10000   | -         |
| 9            | FITC conjugated Anti-rabbit secondary | Cell Signaling | -         | 1:400     |
| 10           | Alexa Fluor-647-anti-mouse secondary  | Cell Signaling | -         | 1:400     |

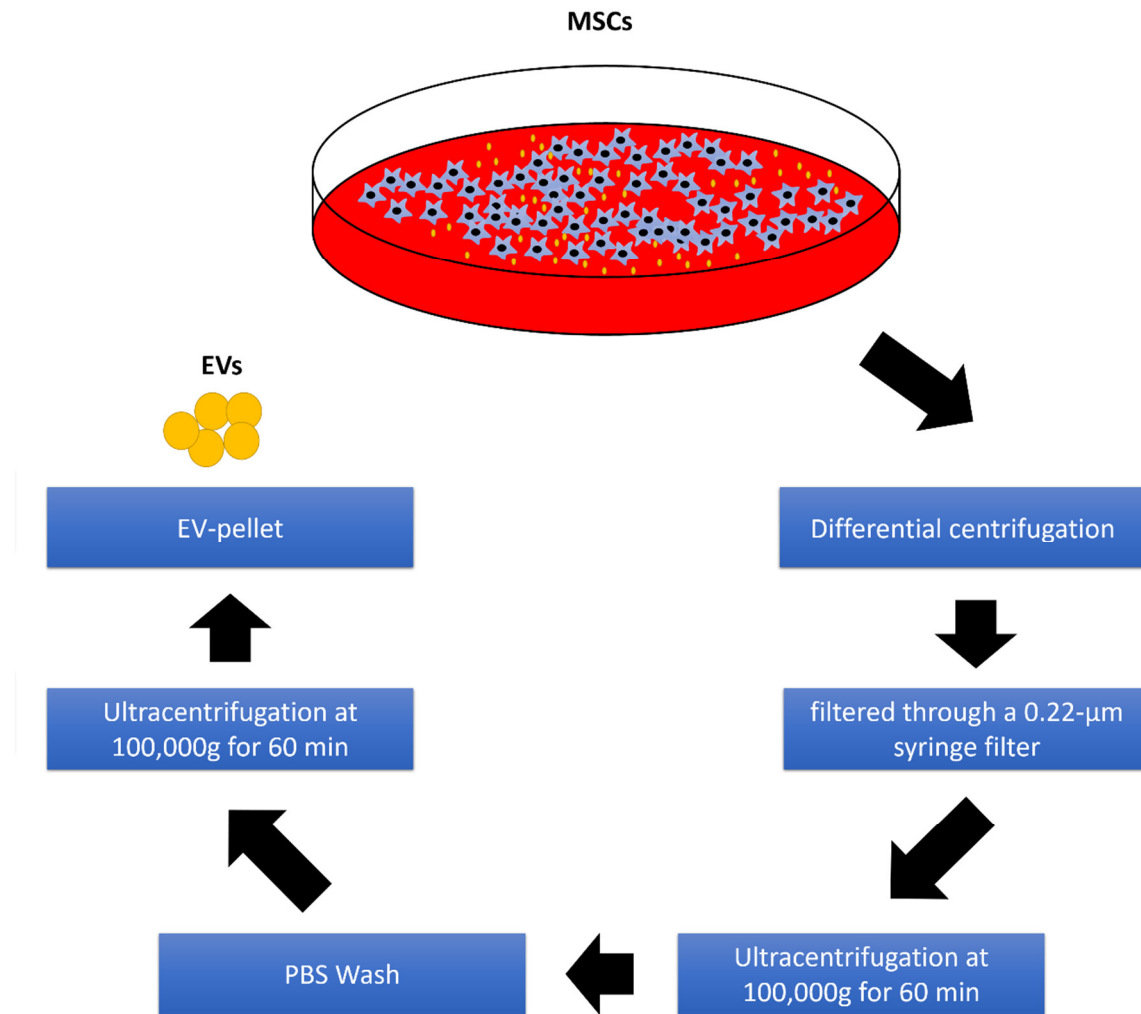

**Supplementary Figure S1.** Schematic representation of isolation of extracellular vesicles (EVs) from mesenchymal stem cells (MSCs).

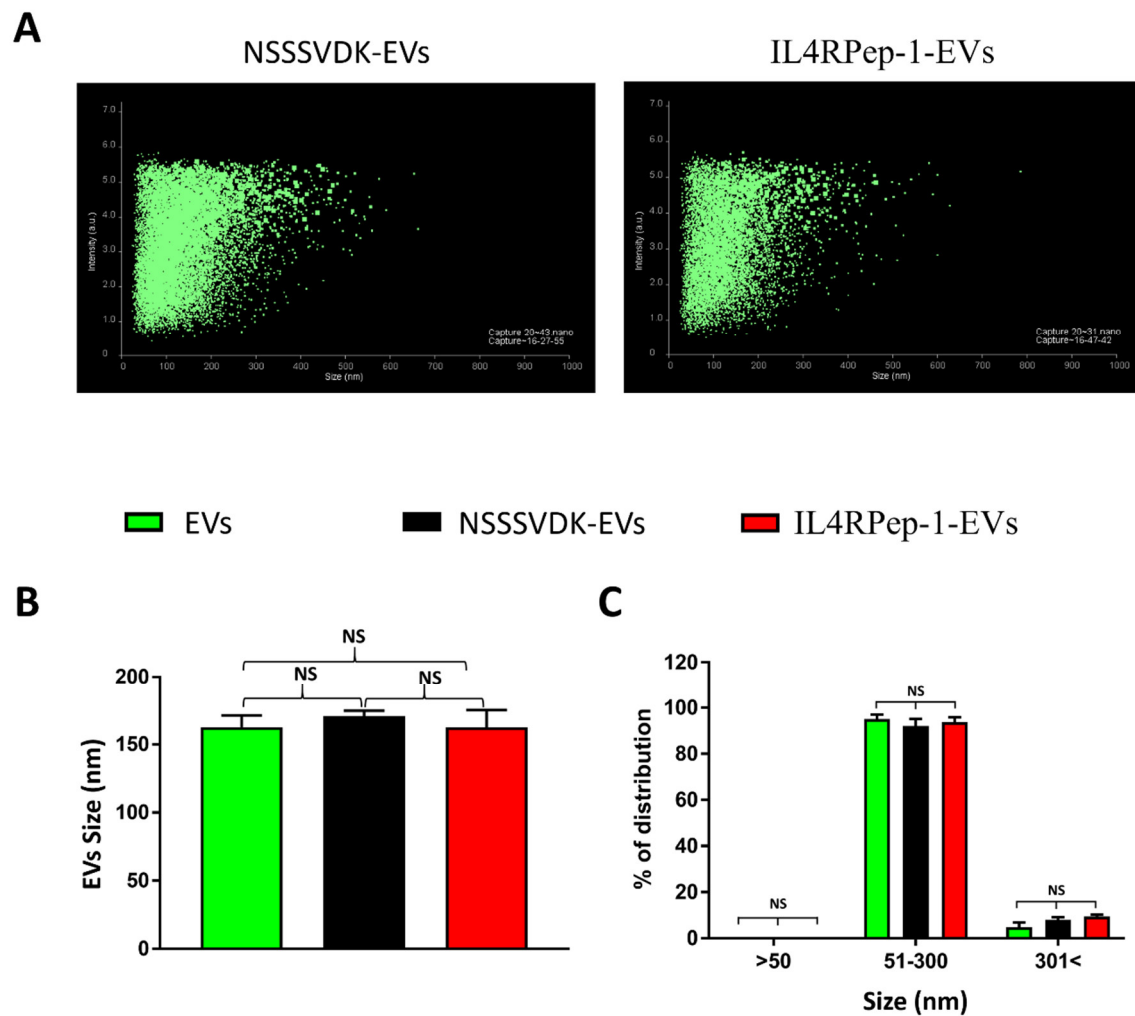

**Supplementary Figure S2. Peptide labeling retains the size and distribution of extracellular vesicles (EVs).** (A) Scatter plot of NSSSVDK-EV and IL4RPep-1-EV analyzed by nanoparticle tracking analysis (NTA). (B) Size of EVs, NSSSVDK-EV and IL4RPep-1-EV determined by NTA. (C) Percentage distribution of EVs represented on bar graph (Approximately 95 % EVs ranged in size between 50-300 nm). Data are represented as mean  $\pm$  standard deviation (SD). Statistical difference between groups was analyzed using Student's t-test.

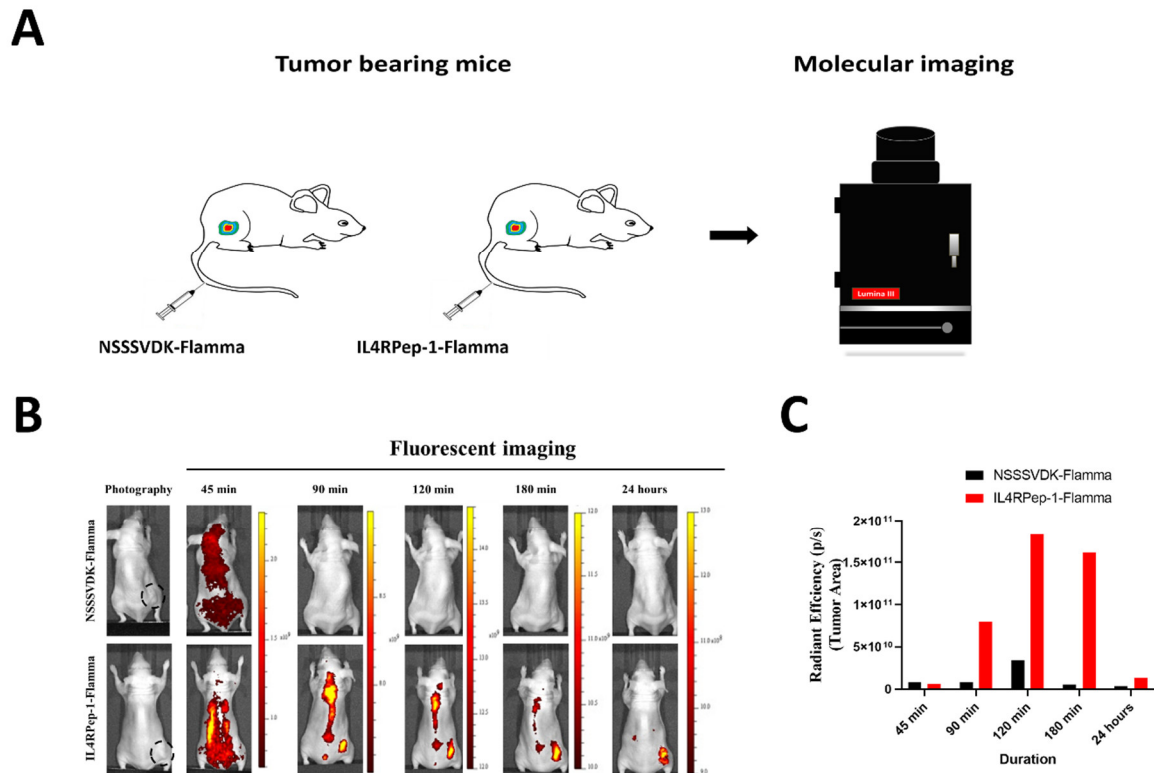

**Supplementary Figure S3. Intravenously (i.v.) injected IL4R Pep-1 targets Cal-62 tumor in mouse (n=1/group), monitored by fluorescent imaging. (A)** Schematic image of Cal-62 tumor bearing mouse i.v. injection with NSSSVDK-Flamma and IL4RPep-1-Flamma; mouse imaged with IVIS imaging system. **(B)** Florescent imaging at 45, 90, 120, 180 min and 24 h post-i.v. injection of NSSSVDK-Flamma or IL4RPep-1-Flamma in Cal-62 tumor bearing mouse. **(C)** Quantification of florescent signals at the tumor region.
